# Supplementary material for: In operando X-ray studies of the conversion reaction in Mn3O4lithium battery anodes
Source: Royal Society of Chemistry journal article supplement (doi:10.1039/c2ta01270g), 2012-11-29
Supplement: c2ta01270g.pdf [file c2ta01270g.pdf]

## Supporting Information for In-Operando X-Ray Studies of the Conversion Reaction in $\text{Mn}_3\text{O}_4$ Lithium Battery Anodes

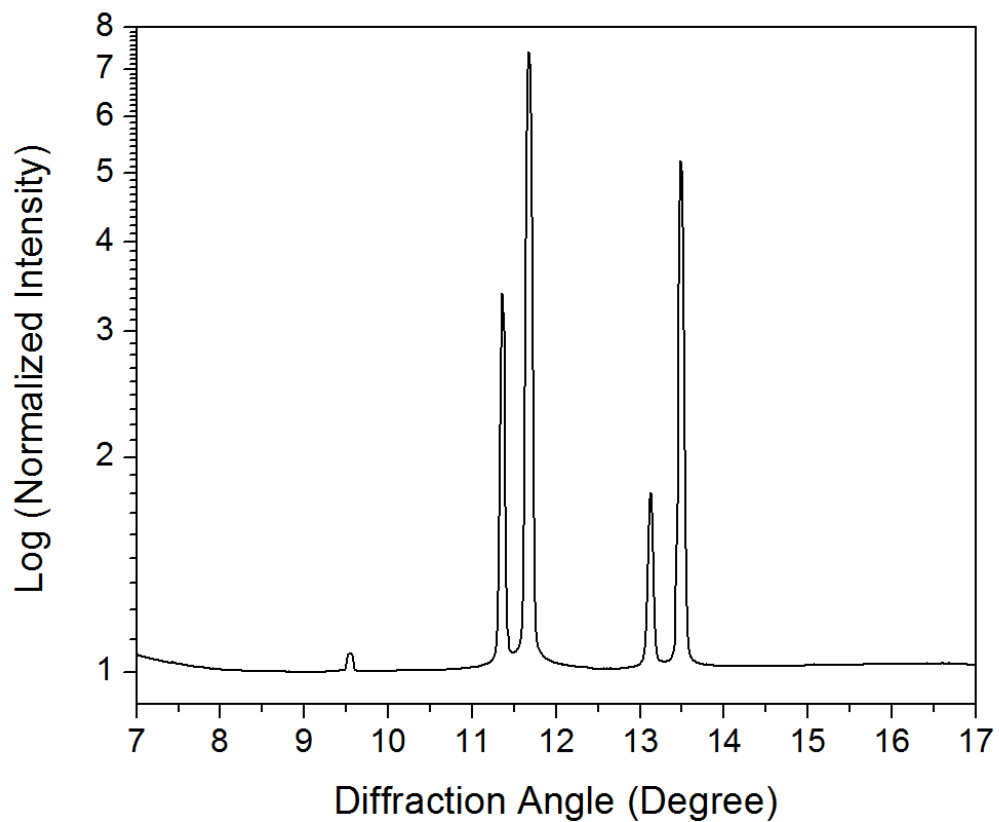

**Figure S1. Piecewise-constructed background for x-ray diffraction. Note the intensity is plotted on a log scale to clearly show the background between diffraction peaks from cell components.**

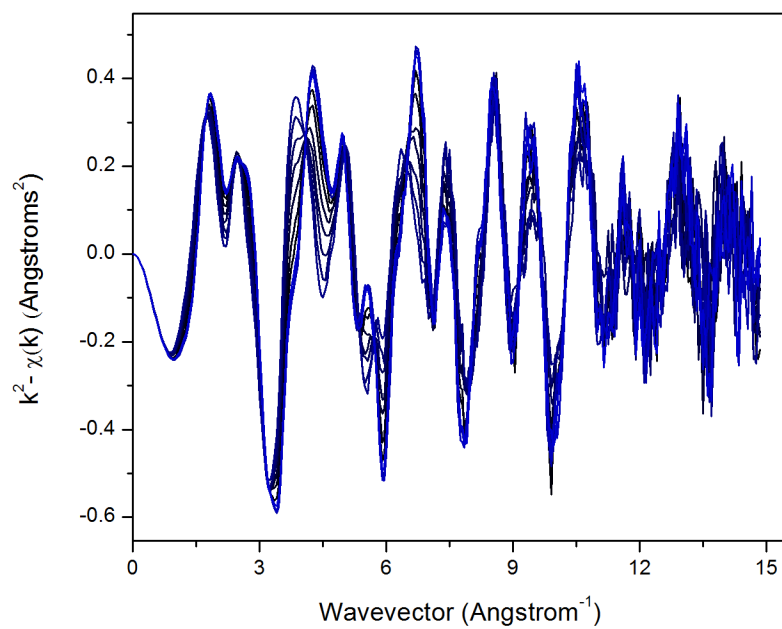

**Figure S2. Overlaid  $k^2$ -weighted EXAFS data during phase I. Data Analysis was performed up to  $k=10$ .**

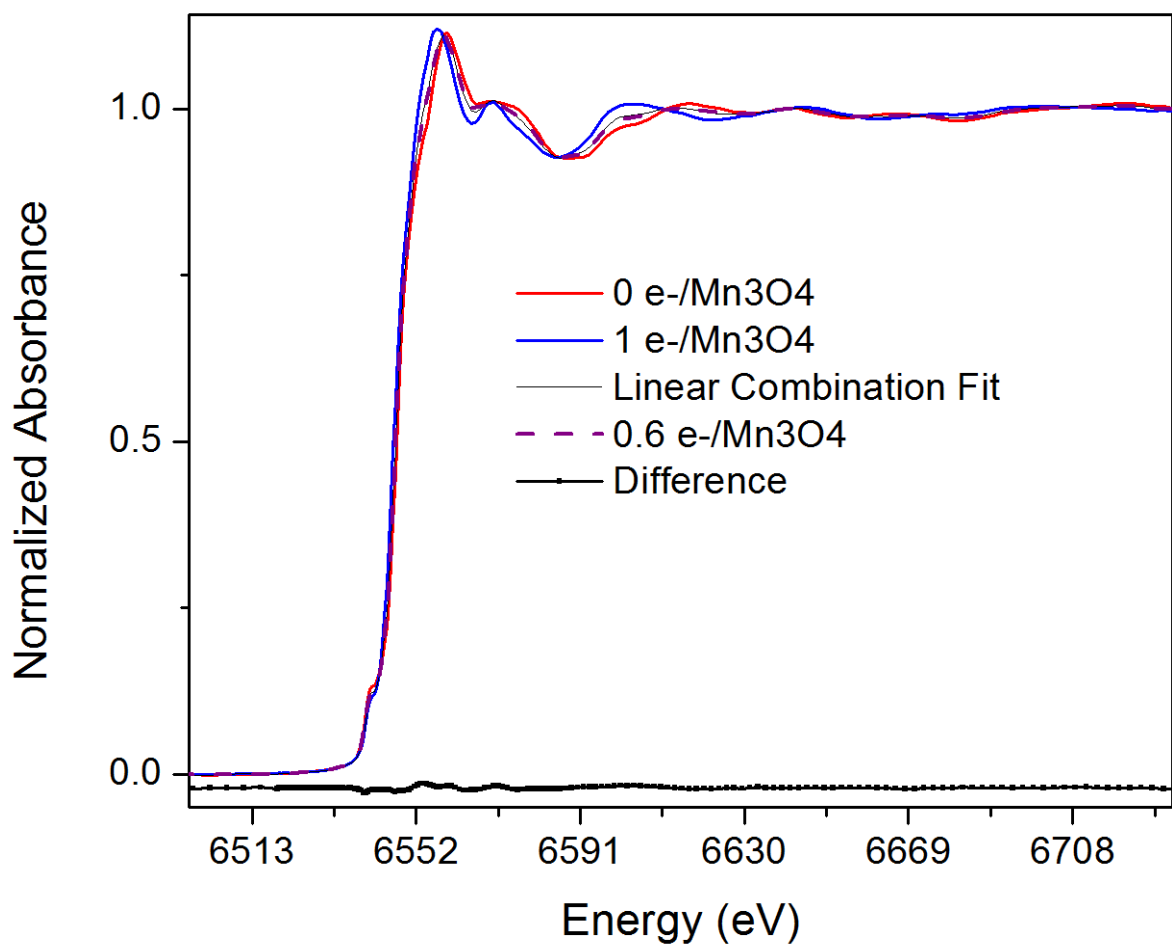

**Figure S3. Demonstration of fitting an intermediate XANES spectra using a linear combination of spectra acquired at 0 and 1 e<sup>-</sup>/Mn<sub>3</sub>O<sub>4</sub>.**

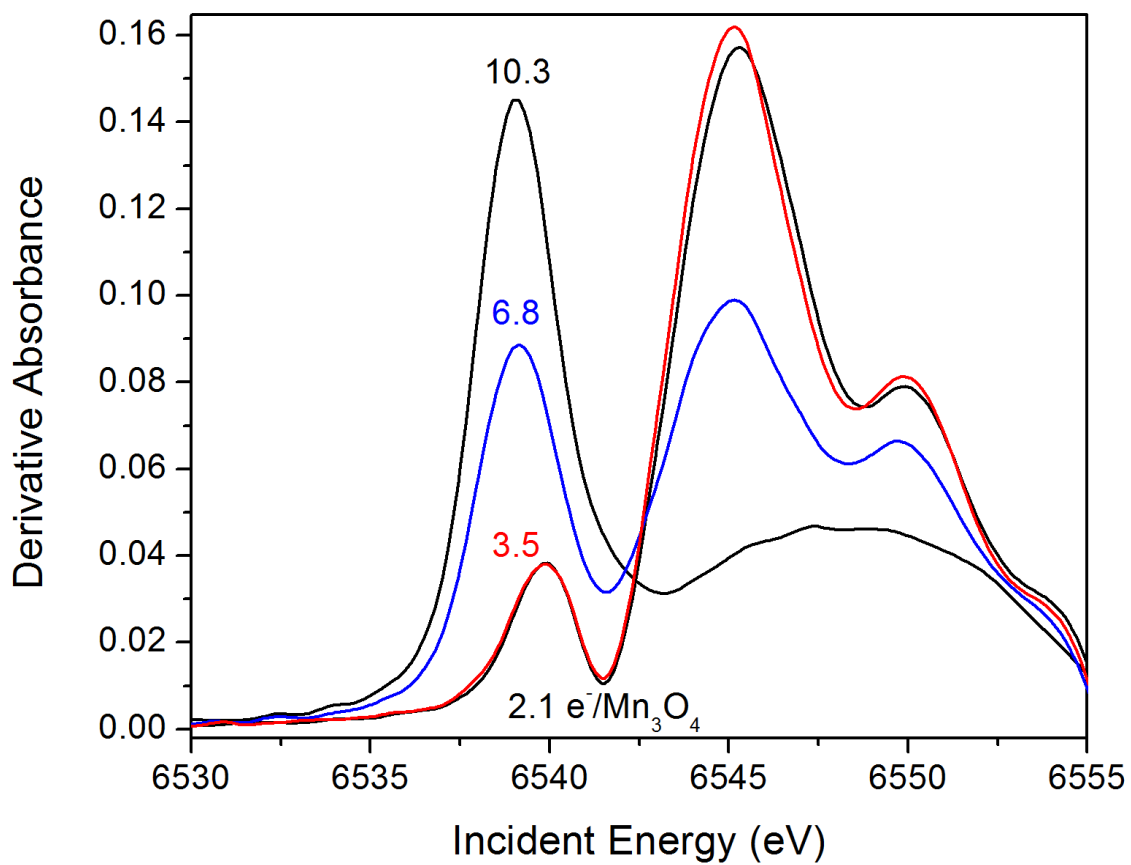

**Figure S4.** First derivative of XANES during lithiation of Mn<sub>3</sub>O<sub>4</sub>.

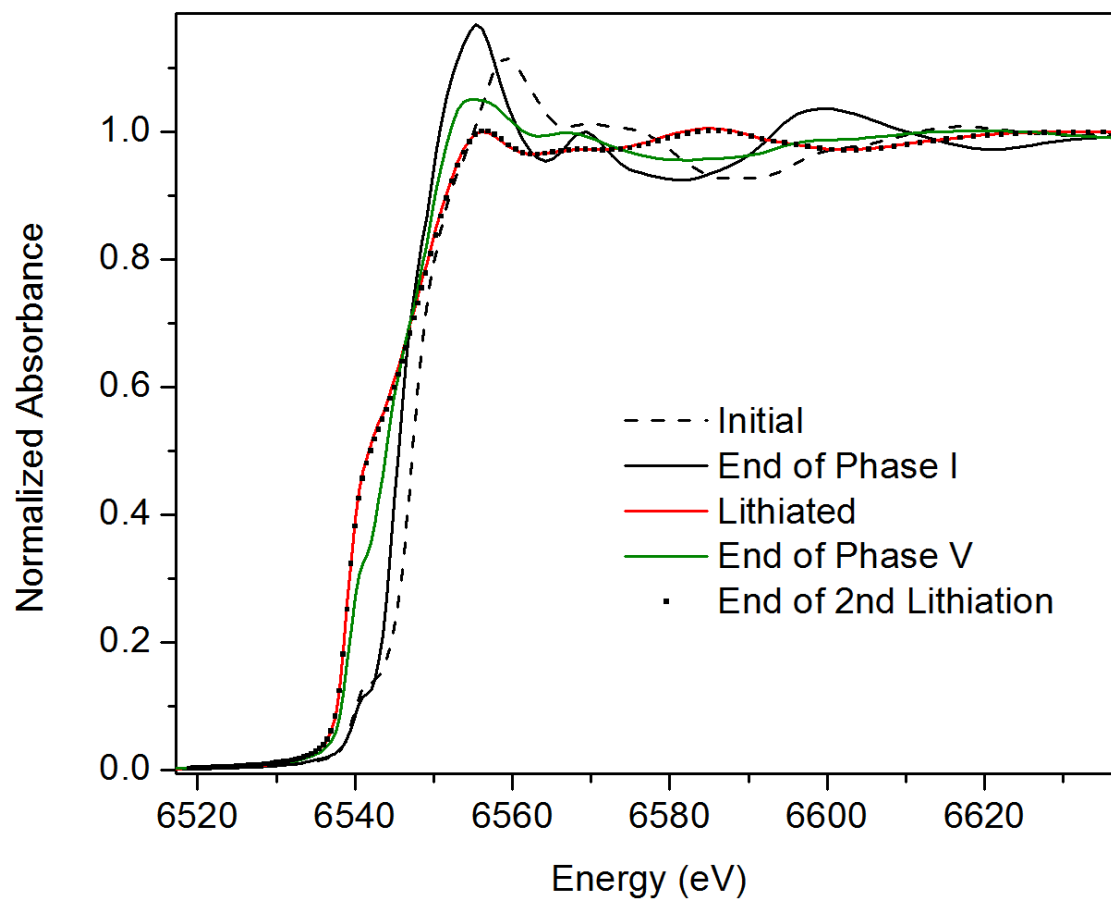

Figure S5. XANES during lithiation of  $Mn_3O_4$ .
